# Supplementary material for: NEK1 Phosphorylation of YAP Promotes Its Stabilization and Transcriptional Output
Source: PubMed Central journal article supplement (PMC7762262; doi:10.3390/cancers12123666), 2020-12-07
Supplement: cancers-12-03666-s001.pdf [file cancers-12-03666-s001.pdf]

# Supplementary Materials: NEK1 Phosphorylation of YAP Promotes its Stabilization and Transcriptional Output

Md Imtiaz Khalil, Ishita Ghosh, Vibha Singh, Jing Chen, Haining Zhu and Arrigo De Benedetti

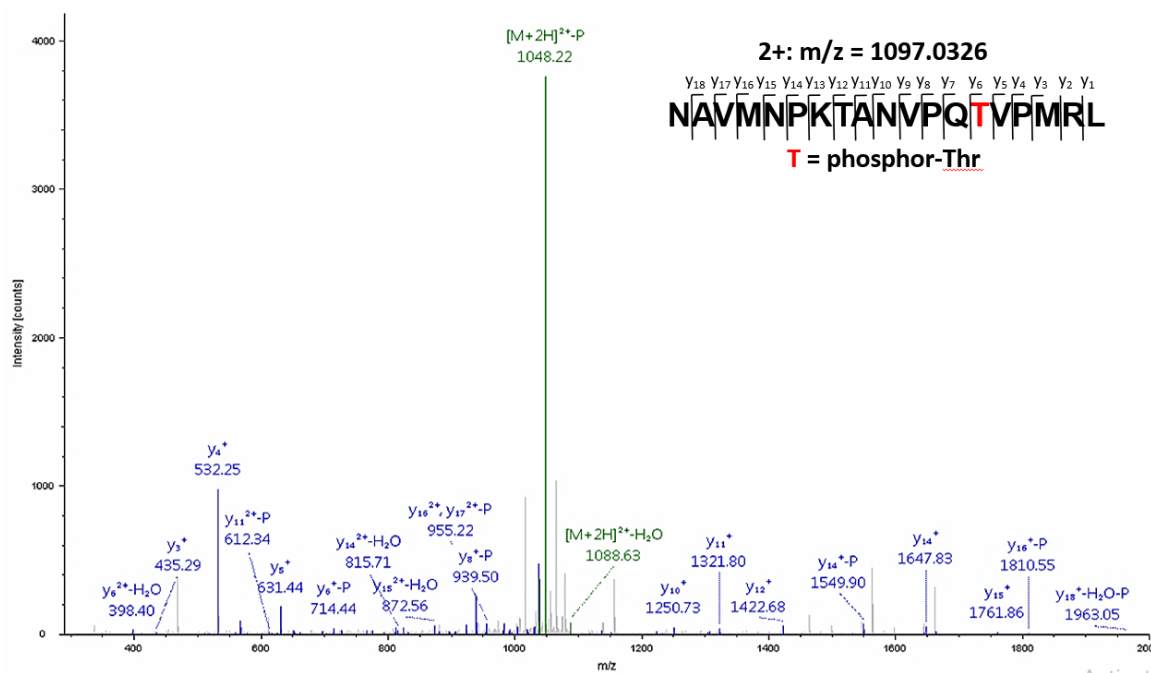

**Figure S1.** MS/MS spectrum of the phosphor-peptide N<sub>70</sub>AVMNPKTANVPQTVPMRL<sub>88</sub> to determine pT83.

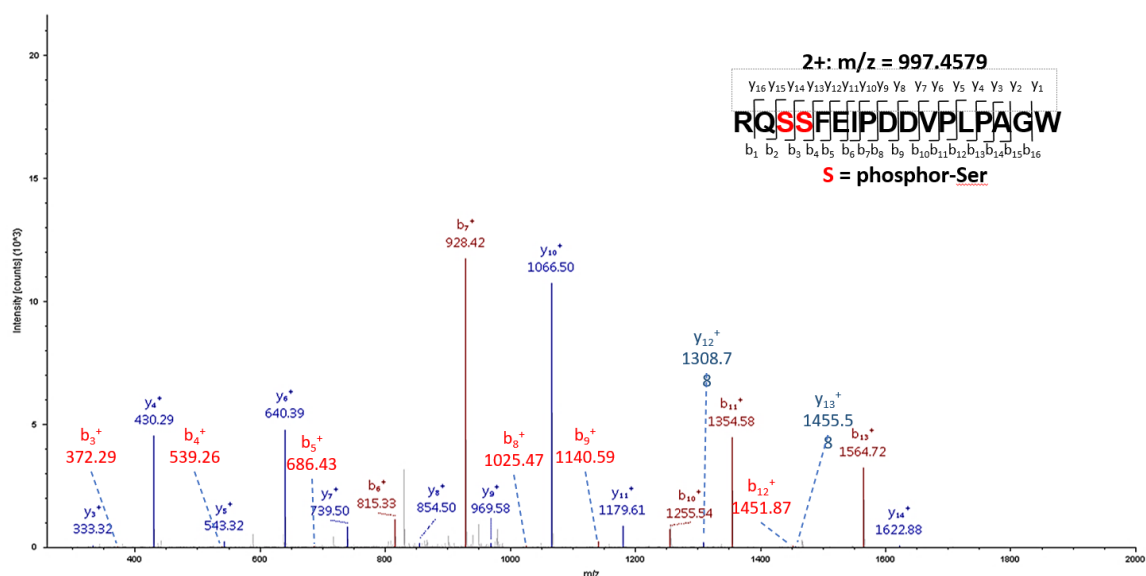

**Figure S2.** MS/MS spectrum of the phosphor-peptide R<sub>161</sub>QSSF EIPDDVPLPAGW<sub>177</sub> to determine pS163/pS164. It is noted that this phosphor-peptide was detected in all 3 sample. It is noted that the MS/MS spectrum cannot distinguish pS163 or pS164.

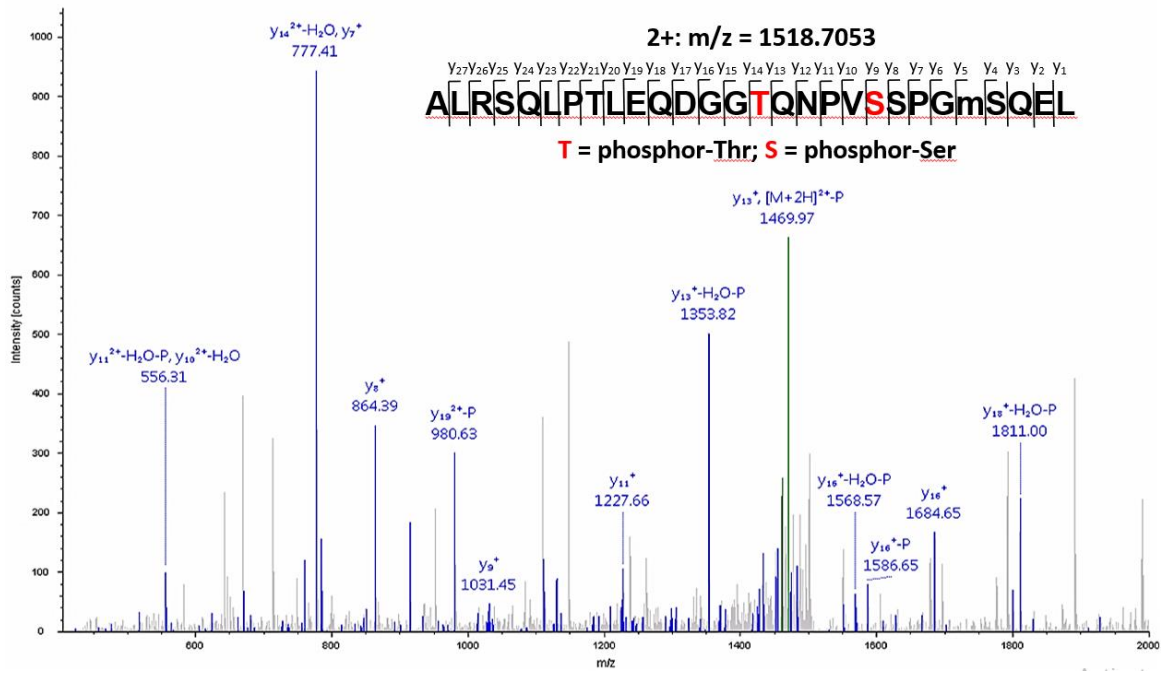

**Figure S3.** MS/MS spectrum of the phosphor-peptide A<sub>347</sub>LRSQLPTLEQDGGTQNPVSSPGmSQEL<sub>374</sub> to determine pT361/pS366. It is noted that the MS/MS spectrum cannot distinguish pT361 or pS366.

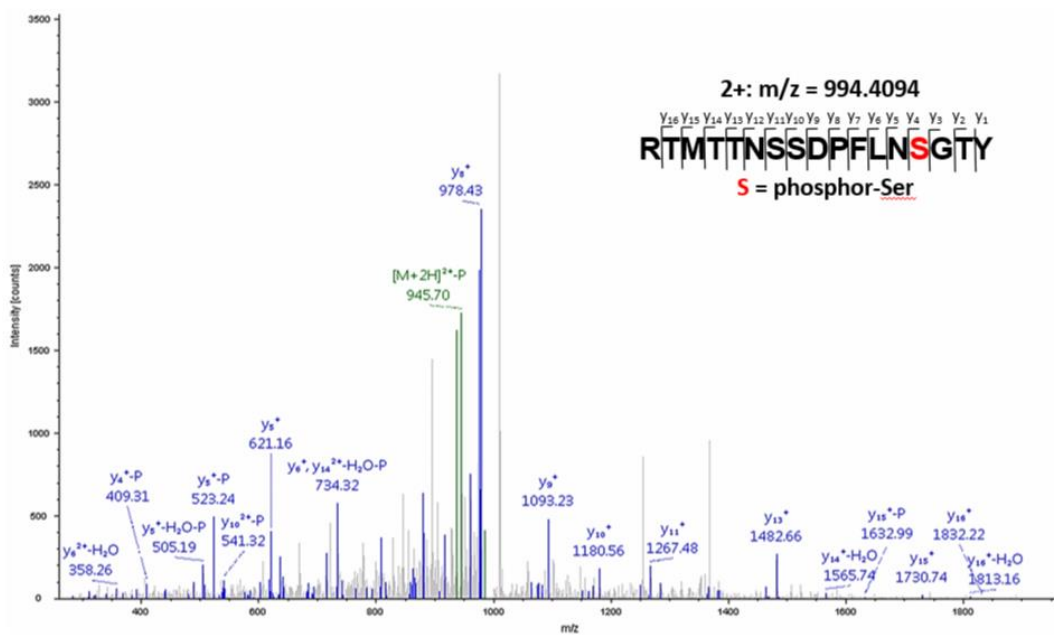

**Figure S4.** MS/MS spectrum of the phosphor-peptide R<sub>375</sub>TMTTNSSDPFLNSGTY<sub>391</sub> to determine pS388.

Fig1A\_LNCaP\_YAP-orig-quantitated

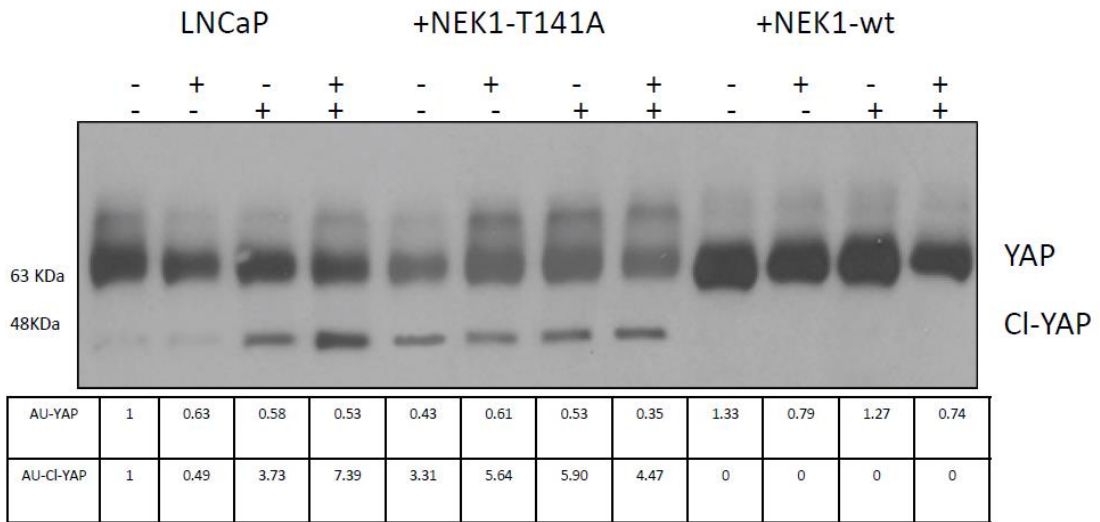

Fig1B\_ NEK1/YAP co-IP

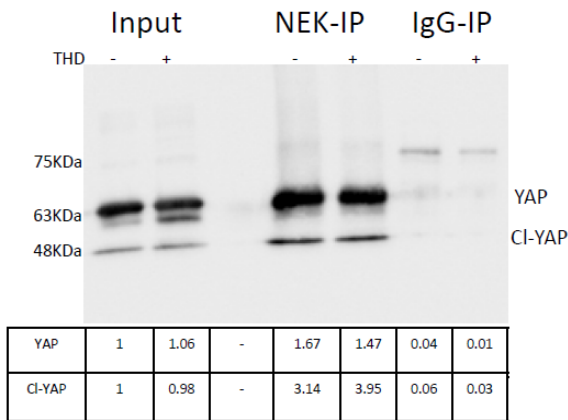

Fig1C\_NT1\_YAP

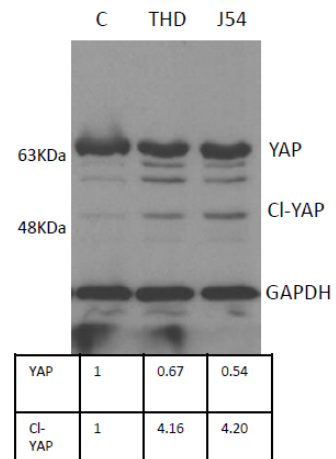

Fig1B\_ NEK1/TLK1 co-IP

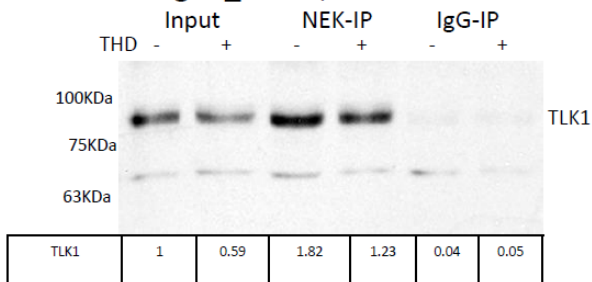

Figure 2A (Left Panel): NT1 NEK1 KO

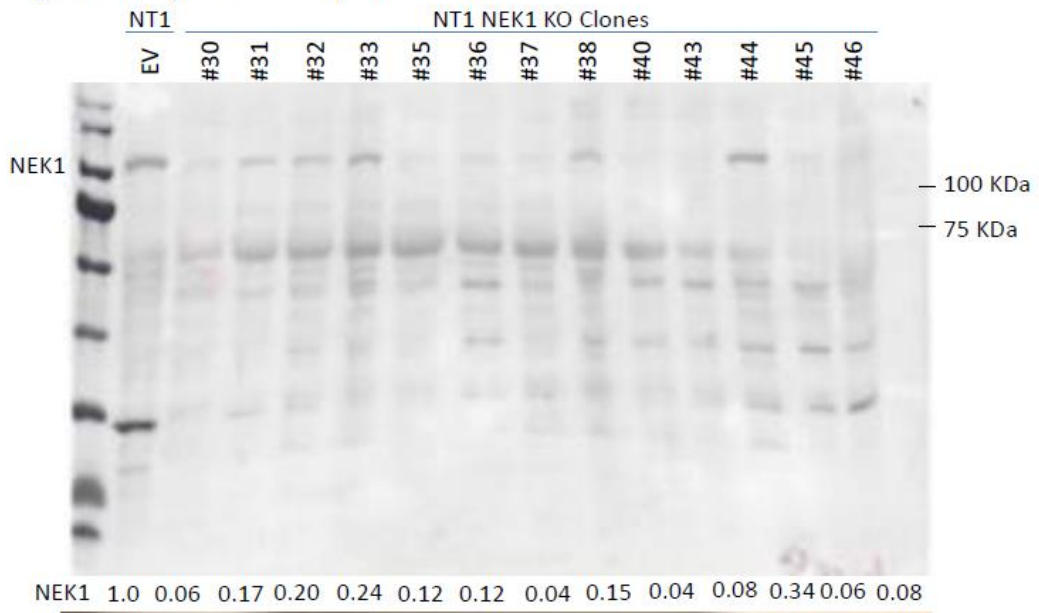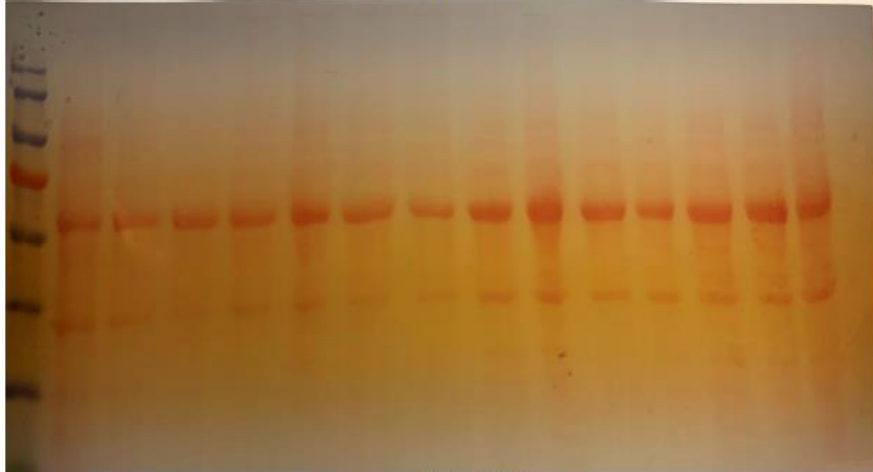

Ponceau S.

Figure 2A (Right Panel): YAP1 level in NT1 NEK1 KO cells

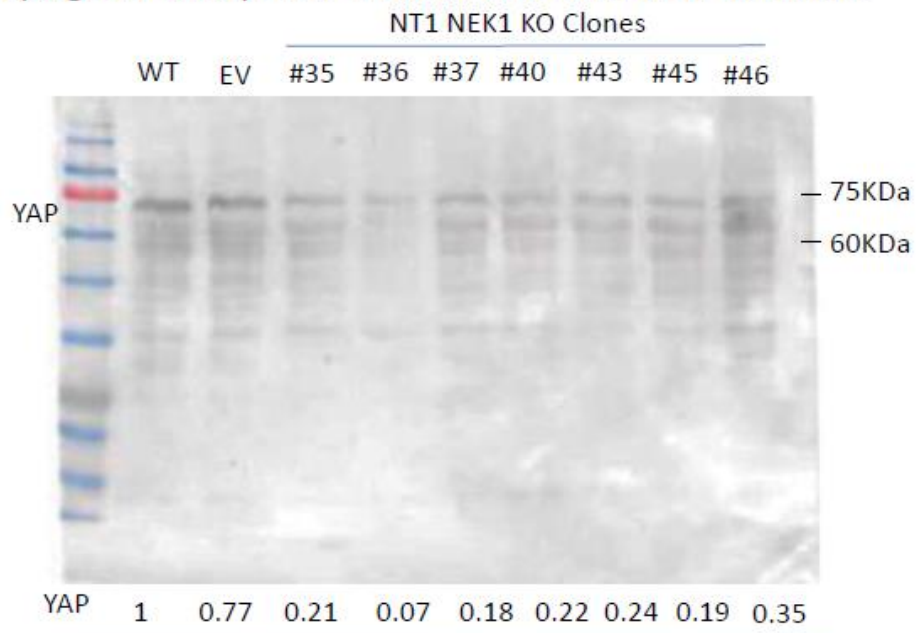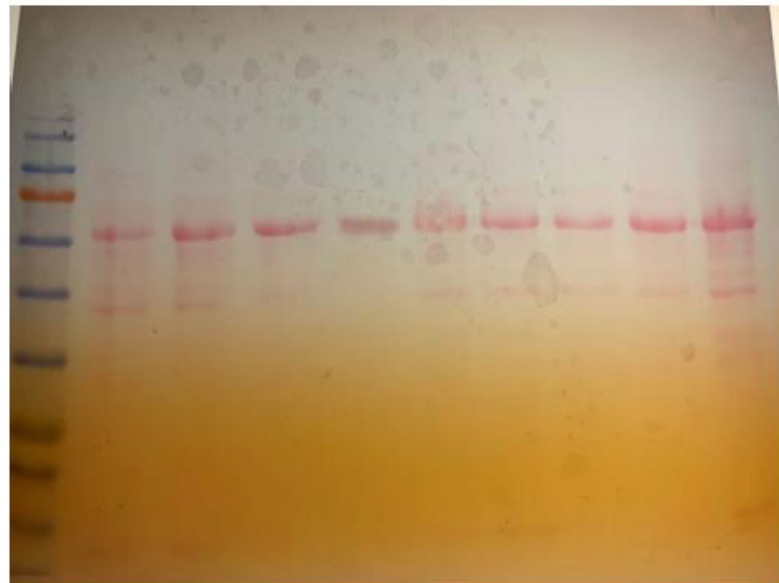

Figure 2C left panel:  
YAP level upon THD treatment

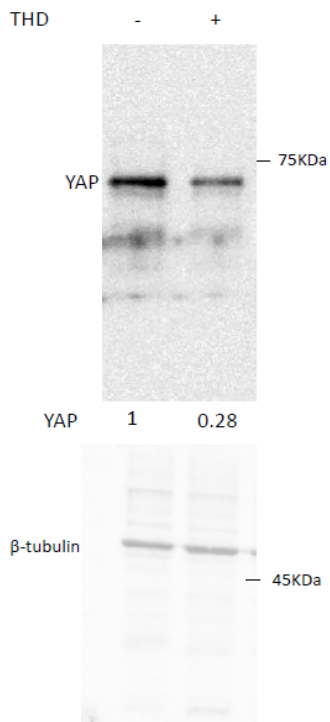

Figure 2C Right panel:  
pYAP level upon THD treatment

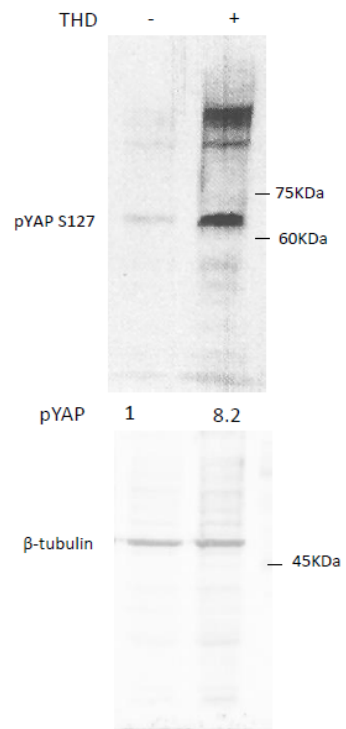

Figure 2D left panel:  
TLK1 knockdown with shRNA

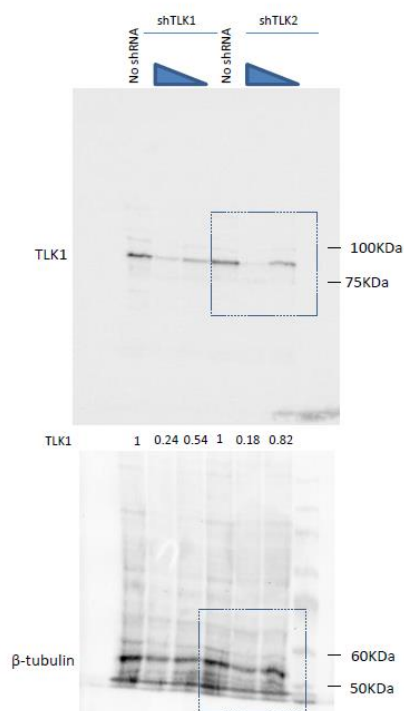

Figure 2D right panel: pNEK1 level in  
TLK1 KD cells

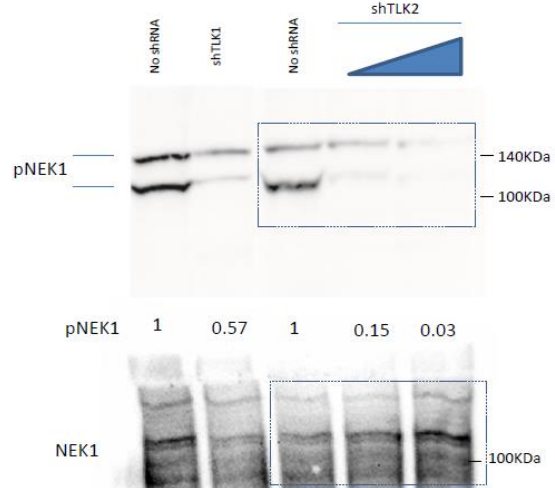

Figure 3C: Radioactive IVK of YAP1

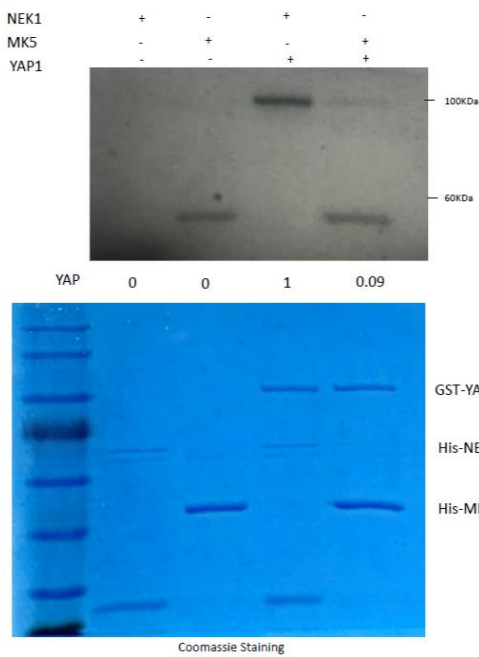

Figure 3D: IVK of YAP1 for MS determination

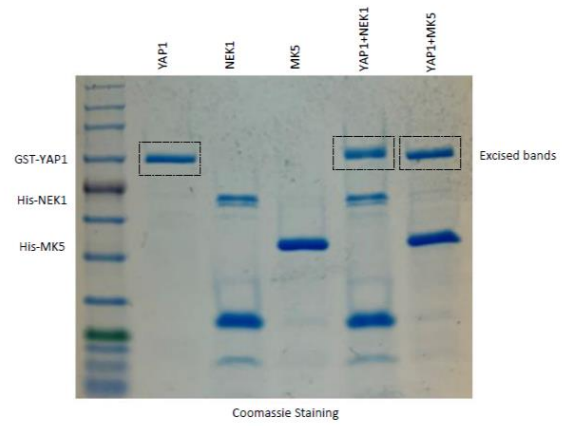

Figure 3E: YAP1 pTyr determination

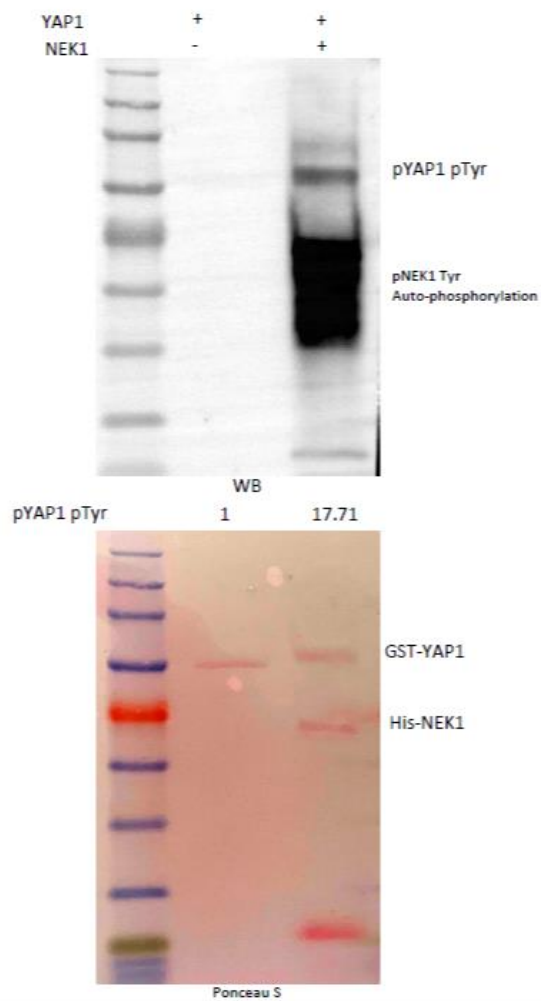

Figure S5. Densitometry of the original uncropped blots and gel images with their respective numbers from the main figures.

**Table S1.** Assigned phosphorylated sites.

| Phosphorylated Sites | Peptides                                                                                        | YAP1 | YAP1 + NEK1 | YAP1 + MK5 |
|----------------------|-------------------------------------------------------------------------------------------------|------|-------------|------------|
| T83                  | N <sub>70</sub> AVMNPKTANVPQ <b>T</b> VPMRL <sub>88</sub>                                       | N    | Y           | N          |
| * S163/S164          | R <sub>161</sub> Q <b>SS</b> FEIPDDVPLPAGW <sub>177</sub>                                       | Y    | Y           | Y          |
| * T361/S366          | A <sub>347</sub> LRSQ <b>L</b> P <b>T</b> LEQDGG <b>T</b> QNPV <b>SS</b> PGmSQEL <sub>374</sub> | N    | Y           | N          |
| S388                 | R <sub>375</sub> TMTTNSDDPFLN <b>S</b> GTY <sub>391</sub>                                       | N    | Y           | N          |
| * S406/Y407          | H <sub>392</sub> SRDESTDSGLSM <b>S</b> Y <sub>407</sub>                                         | N    | Y           | N          |
| T493                 | A <sub>491</sub> A <b>T</b> KLDKESFL <sub>501</sub>                                             | N    | Y           | N          |

\* Cannot tell which site is preferred based on the MS/MS spectrum.
